# Supplementary material for: Indoor and outdoor air quality impacts of cooking and cleaning emissions from a commercial kitchen
Source: Royal Society of Chemistry journal article supplement (doi:10.1039/d2em00484d), 2023-01-01
Supplement: d2em00484d1.pdf [file d2em00484d1.pdf]

Supporting Information for:

Indoor and Outdoor Air Quality Impacts of Cooking and Cleaning Emissions  
from a Commercial Kitchen

Jenna C. Ditto<sup>1,2,†</sup>, Leigh R. Crilley<sup>3,‡</sup>, Melodie Lao<sup>3</sup>, Trevor C. VandenBoer<sup>3</sup>,  
Jonathan P.D. Abbatt<sup>2,\*</sup>, Arthur W.H. Chan<sup>1,2,\*</sup>

<sup>1</sup> Department of Chemical Engineering and Applied Chemistry, University of Toronto, Toronto, Canada; <sup>2</sup> Department of Chemistry, University of Toronto, Toronto, Canada <sup>3</sup> Department of Chemistry, York University, Toronto, Canada

<sup>†</sup>Now at: Department of Energy, Environmental, and Chemical Engineering, Washington University in St. Louis, Saint Louis, USA;

<sup>‡</sup> Now at: WSP Australia, Brisbane, Australia

\* correspondence to: [jonathan.abbatt@utoronto.ca](mailto:jonathan.abbatt@utoronto.ca) or [arthurwh.chan@utoronto.ca](mailto:arthurwh.chan@utoronto.ca)

Number of pages: 27

Number of figures: 18

Number of tables: 6

## S1. Further notes on PTR-MS calibrations for monochloramine

Two different sensitivities for monochloramine ( $\text{NH}_2\text{Cl}$ ) were considered in this analysis. First, monochloramine sensitivity was determined theoretically following the approach in Sekimoto et al. (1). We treated monochloramine as a primary amine and calculated its polarizability and dipole moment to estimate its proton transfer rate constant (1). Based on the linear relationship between proton transfer rate constant and sensitivity for directly calibrated species (i.e., using the standard cylinder or liquid standard method discussed in *Materials and Methods*), we estimated the theoretical sensitivity for monochloramine to be 407 cps/ppb.

Second, we constrained monochloramine sensitivity using a measurement of total basic nitrogen-containing gases in the kitchen from a novel instrument that measured total reactive nitrogen species (2). Using the maximum mixing ratio for basic nitrogenous gases in the kitchen and attributing it entirely to monochloramine, this resulted in a monochloramine sensitivity of 324 cps/ppb. However, we emphasize that this is an upper limit sensitivity, as it is unlikely that the entire basic gas-phase nitrogen-containing signal would consist of monochloramine alone.

We compared these values to a sensitivity that was previously determined experimentally and measured with this same PTR-MS (3). We ratioed the monochloramine sensitivity from these prior experimental calibrations to the benzene sensitivity from the same time period, and then compared this ratio with the benzene sensitivity during the kitchen measurements discussed here. This resulted in an experimentally derived monochloramine sensitivity of 329 cps/ppb during our field measurements.

In this study, the value constrained with the total basic nitrogen measurement was applied; 324 cps/ppb was used to convert the PTR-MS ion signal to a mixing ratio. If the sensitivity used to convert signal to mixing ratio were lowered (as the 324 cps/ppb is an upper

limit), the monochloramine mixing ratios reported here would increase. However, we note that despite this uncertainty, these three sensitivity estimates agree quite well and are at most different by a factor of  $\sim 1.25$ .

## S2. Further notes on plume analysis methodology

For the plume analysis discussed here, a cooking “event” was defined as any time three of these five cooking tracers increased together and remained elevated over their baseline values for several minutes: carbon dioxide (from cooking fuel, food, as well as human emissions), nitrogen monoxide (from cooking fuel), methanol (from heating vegetables and stir frying(4)), acrolein (from heated cooking oils (4)), and the sum of BTEX ions (benzene, toluene, ethylbenzene, and xylenes, from cooking fuels and food (5,6)). An example is shown in Figure S8. By this definition, 68 cooking events were identified throughout the campaign, each lasting from 13-195 minutes, but on average lasting  $66 \pm 37$  minutes (Table S1).

After the start and end times of each event were set, the area under each ion’s time series was computed for each event. Only ions with an assigned molecular formula were considered from PTR-MS data. Time series for CO<sub>2</sub> from the kitchen and exhaust were also integrated. A baseline value was subtracted from each integral. The baseline for each ion was defined as the minimum value at either the start or end of the event interval, similar to Wang et al.’s approach (Figure S8) (7). The volume sampled during each event was calculated for each instrument (i.e., the PTR-MS and the CO<sub>2</sub> monitors), and the area under each curve was normalized by volume sampled to enable event intercomparison. Across all times series integrals for the 68 cooking events, 7.5% of integrals were negative due to slight dips in signal below the set baseline. These negative areas were discarded.

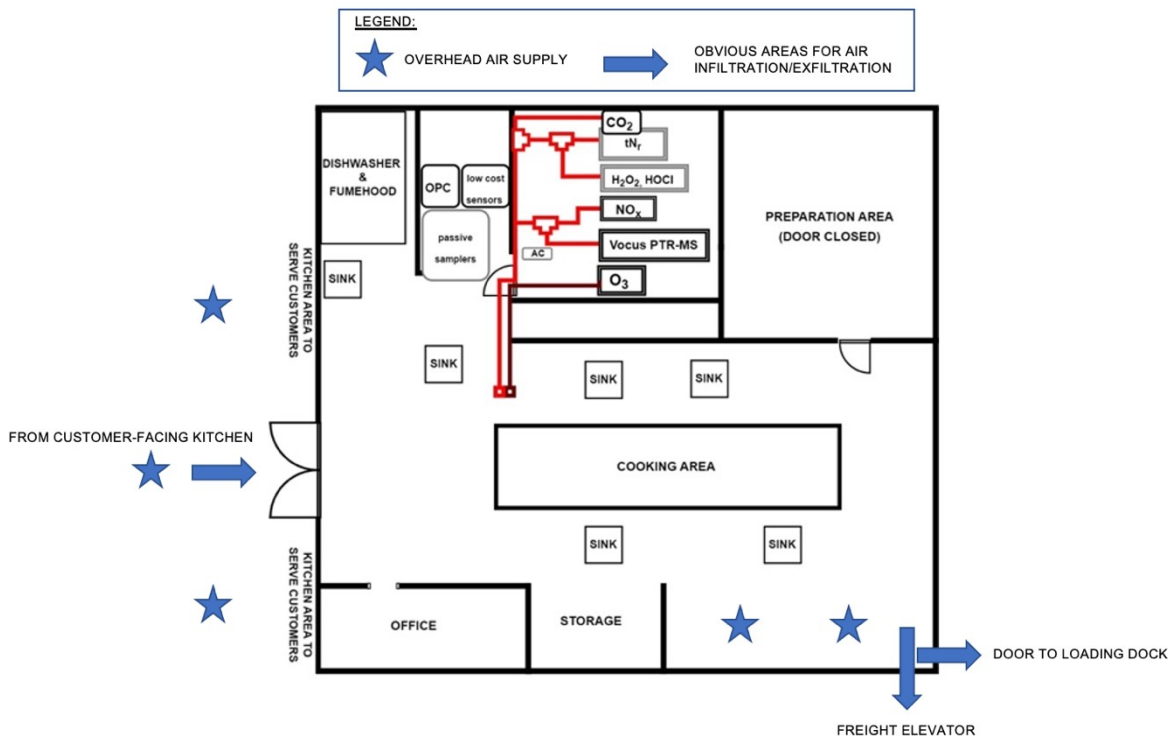

**Figure S1.** Simplified diagram of the kitchen. Red and maroon lines indicate instrument sampling tubing running between the office space where instruments were housed and the main kitchen area. The gas-phase inlets were positioned approximately 2 m away from the main cooking area, denoted by the rectangular region in the center of the diagram. Range hoods were positioned directly above the main cooking area. Overhead air supply locations are noted on the diagram with stars. Other obvious points for air infiltration and exfiltration are marked with arrows.

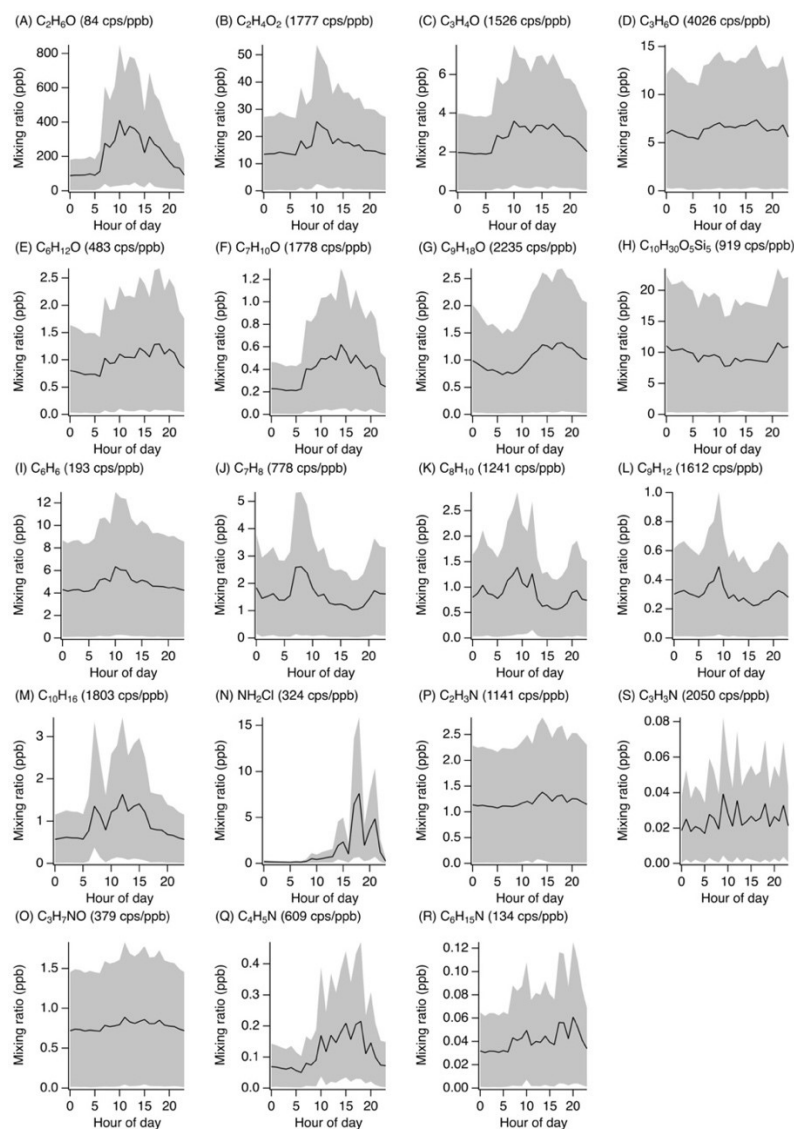

**Figure S2.** Diurnal time series for calibrated gases, with sensitivity during the field measurement period shown beside each molecular formula. The solid black line represents the mean, and the grey shading represents the range of mixing ratios observed. (A)  $C_2H_6O$  (calibrated with ethanol), (B)  $C_2H_4O_2$  (calibrated with acetic acid), (C)  $C_3H_6O$  (calibrated with acetone), (D)  $C_3H_4O$  (calibrated with acrolein), (E)  $C_6H_{12}O$  (calibrated with hexanal), (F)  $C_9H_{18}O$  (calibrated with nonanal), (G)  $C_7H_{10}O$  (calibrated with heptadienal), (H)  $C_{10}H_{30}O_5Si_5$  (D5-siloxane, calibrated with D4-siloxane), (I)  $C_6H_6$  (calibrated with benzene), (J)  $C_7H_8$  (calibrated with toluene), (K)  $C_8H_{10}$  (xylenes, calibrated with o-xylene), (L)  $C_9H_{12}$  (trimethylbenzenes, calibrated with 1,3,5-trimethylbenzene), (M)  $C_{10}H_{16}$  (monoterpenes, calibrated with limonene), (N)  $NH_2Cl$  (calibrated with monochloramine), (O)  $C_3H_7NO$  (calibrated with propionamide), (P)  $C_2H_3N$  (calibrated with acetonitrile), (Q)  $C_4H_5N$  (calibrated with pyrrole), (R)  $C_6H_{15}N$  (calibrated with triethylamine), and (S)  $C_3H_3N$  (calibrated with acrylonitrile). We note that the uncertainty of the ethanol measurement is especially high, due to its very low sensitivity in the PTR-MS and due to possible contributions to the signal from dimethyl ether (possibly arising from refrigerants), with even lower sensitivity. Thus, even a small amount of dimethyl ether present, with its very low instrument response, would drive the ethanol mixing ratio up.

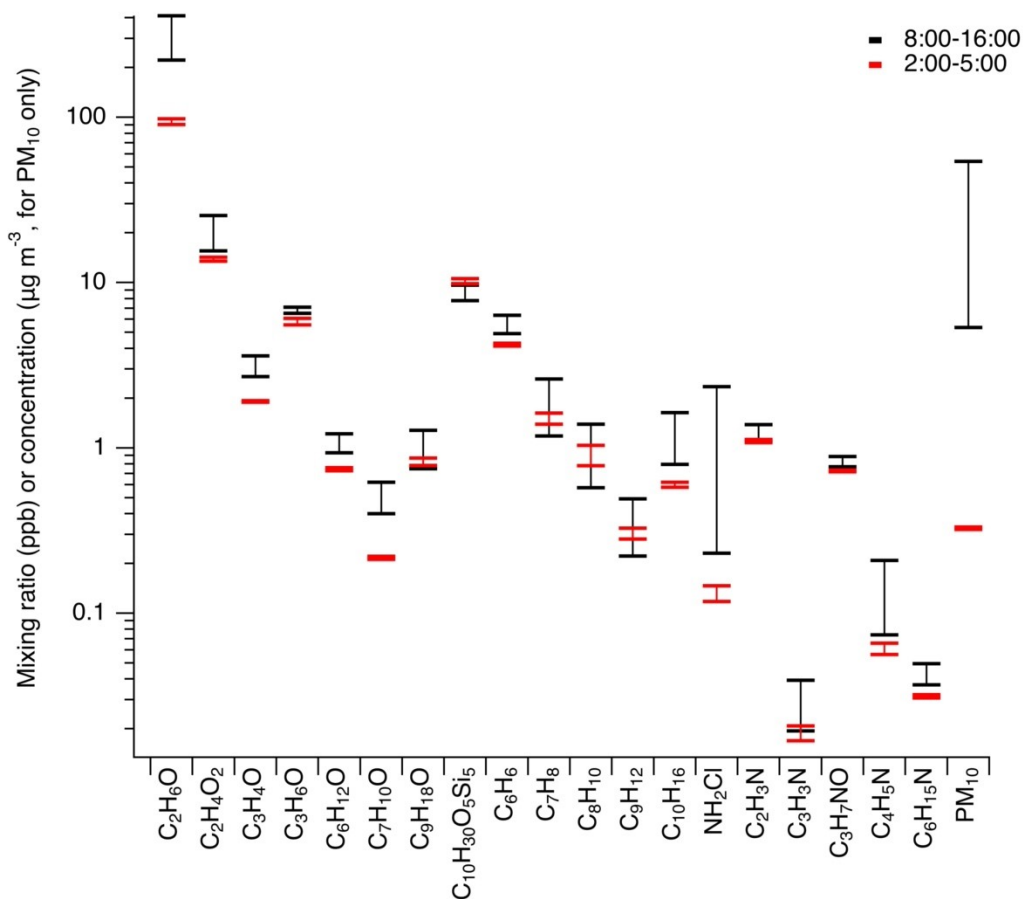

**Figure S3.** Mixing ratio range for calibrated gases and concentration range for total PM<sub>10</sub> from diurnal profiles. Bars represent minimum and maximum for each diurnal profile. The overnight background period (2:00-5:00) is compared to the main cooking period (8:00-16:00) to emphasize the relatively high background signals overnight and to highlight the important role of surface reservoirs in the kitchen.

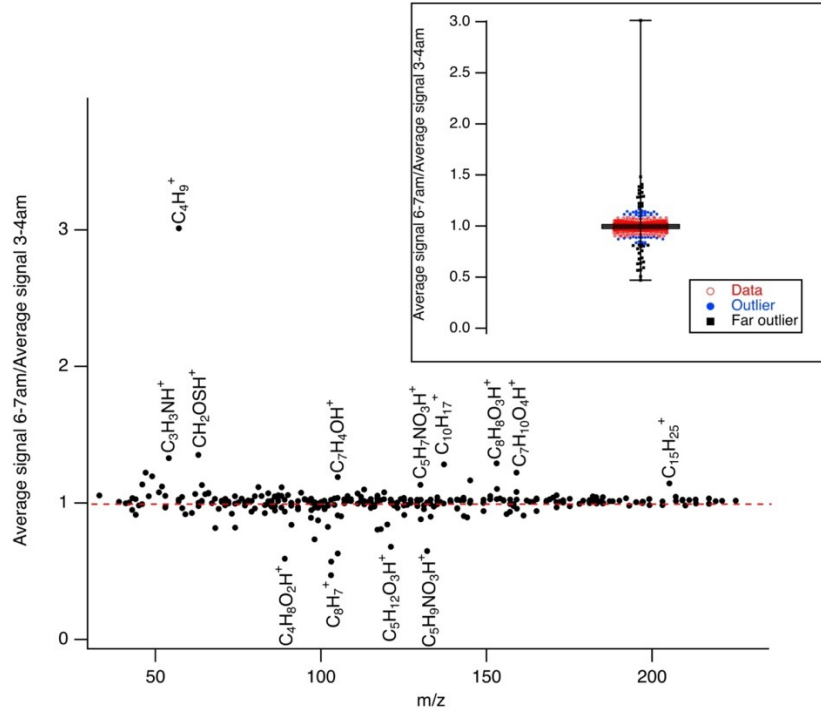

**Figure S4.** Average VOC signal for all ions with molecular formula assignments, calculated from 6:00-7:00 (after ventilation was turned on) and 3:00-4:00 (before ventilation was turned on). The red dotted line indicates a ratio of 1. The inset shows a box plot with whiskers at the minimum and maximum ratio value, data points in red, outlier points in blue ( $1.5 \times$  interquartile range), and far outlier points in black ( $3 \times$  interquartile range), emphasizing the tightness of the distribution around a ratio of 1 pre- and post-ventilation.

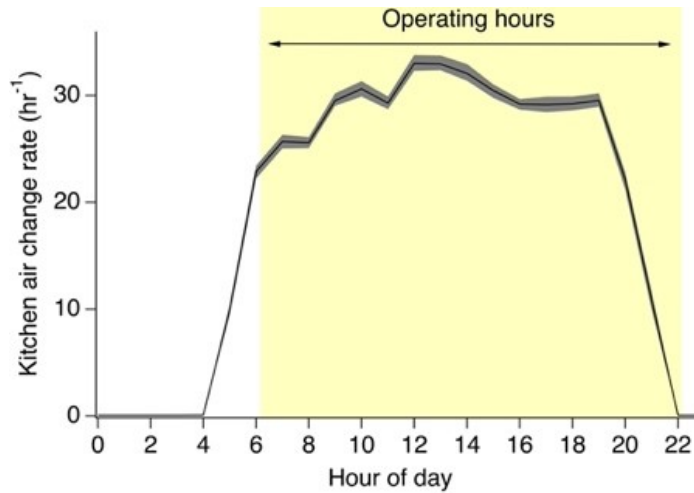

**Figure S5.** Diurnal plot of the air change rate in the kitchen (black line) and its lower and upper limit values (shading).

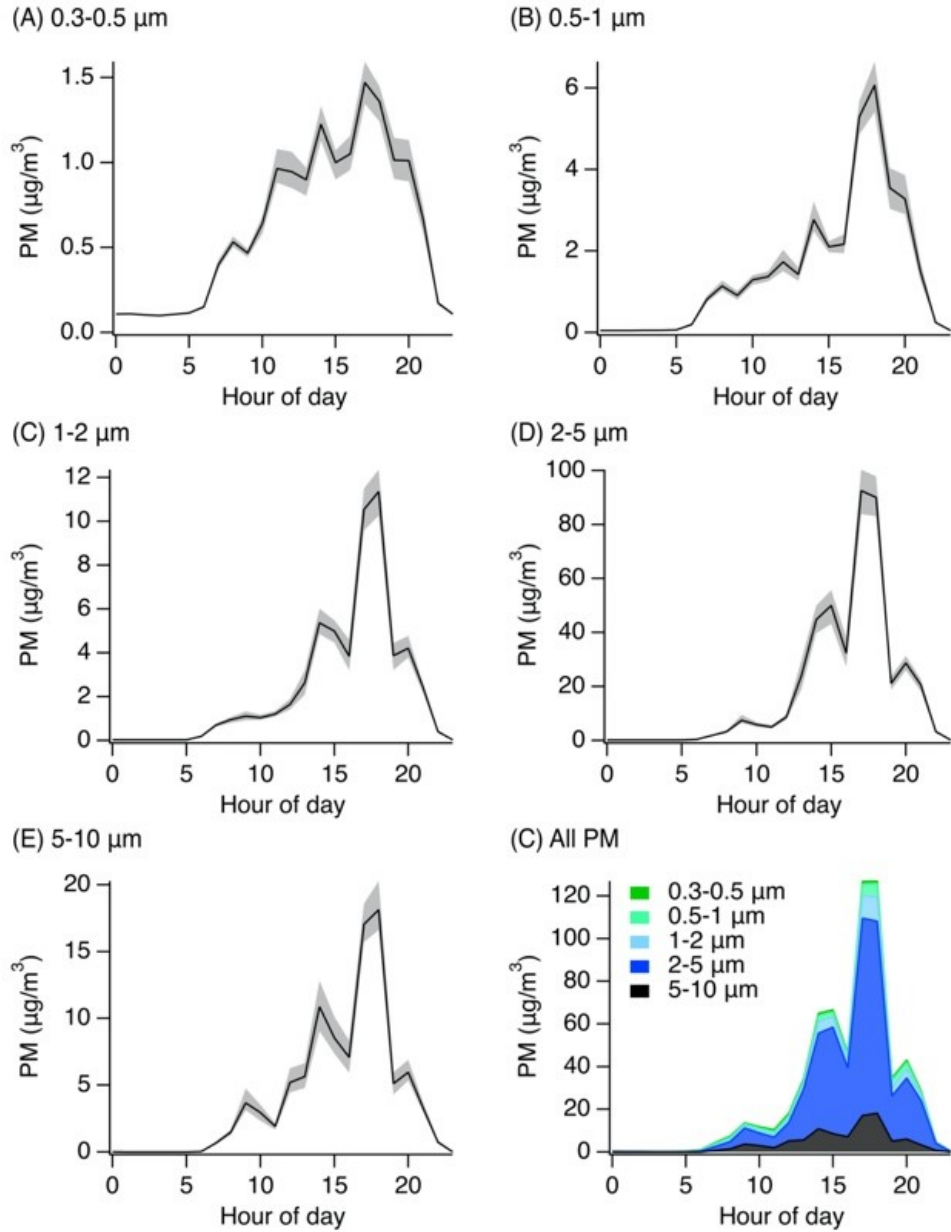

**Figure S6.** Diurnal plots of particulate matter concentration, showing (A)  $PM_{0.3-0.5}$ , (B)  $PM_{0.5-1}$ , (C)  $PM_{1-2}$ , (D)  $PM_{2-5}$ , (E)  $PM_{5-10}$ , (F) all sizes together. The smallest particles ( $0.3-0.5 \mu\text{m}$ ) had a strong outdoor air source; their concentrations indoors increased with increased outdoor air supplied. While the inlet air was filtered, the smallest particles had the lowest collection efficiency and thus likely infiltrated the kitchen. For example, when the ventilation turned on around 6:00, an increase in  $PM_{0.3-0.5}$  was observed. Larger particles become more important later in the afternoon during cleaning, peaking around 17:00-18:00.



(A) Average gas-phase mixing ratios during background periods overnight (2:00-5:00)

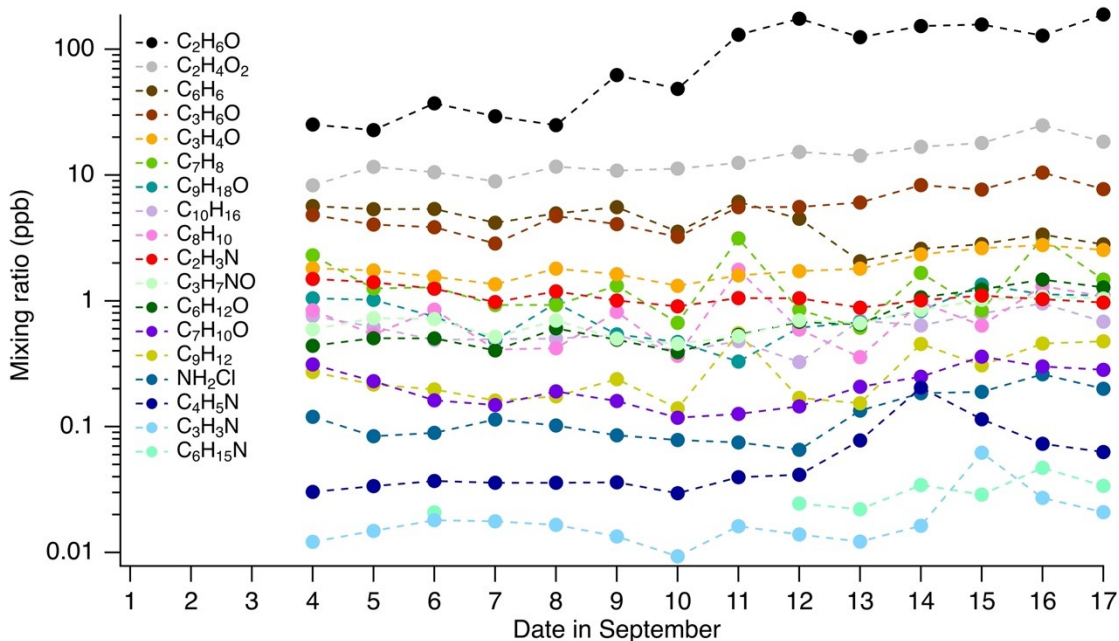

(B) Average temperature and relative humidity difference relative to September 4 (first day of gas-phase data) during background periods overnight (2:00-5:00)

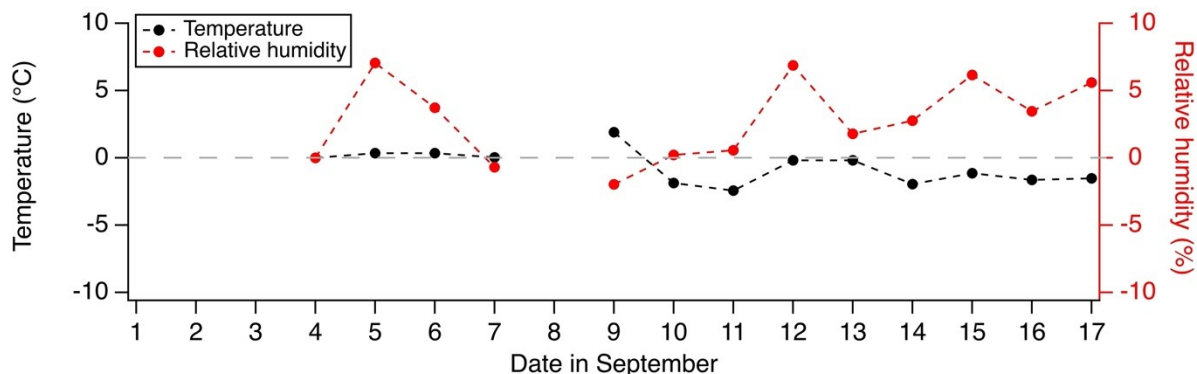

**Figure S7.** (A) Average background mixing ratios for quantified gases, calculated from 2:00-5:00 each day from ion time series. (B) Average temperature and relative humidity during the same background periods, shown as a difference relative to the conditions on the first day of gas-phase measurements (September 4). These data are shown here to emphasize that there was no consistently increasing temperature throughout the campaign that drove increased evaporation of gases from surfaces.

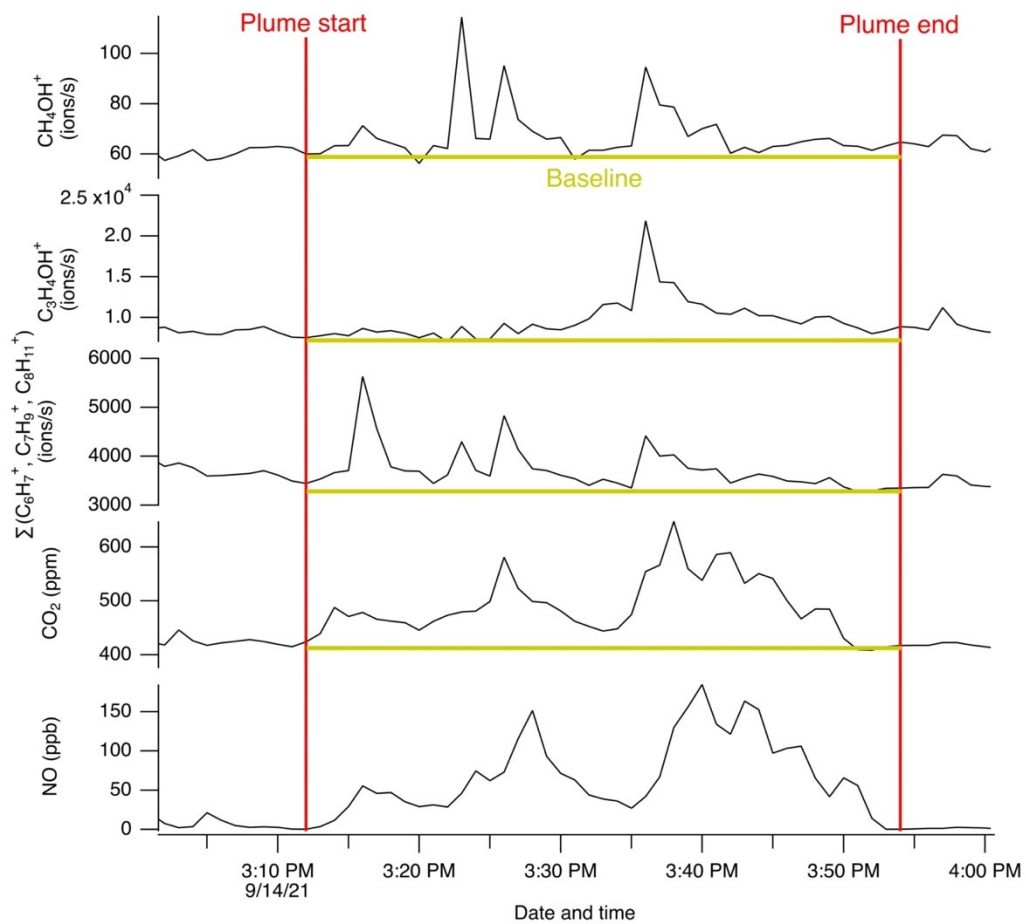

**Figure S8.** Example of plume and baseline definitions using cooking tracers.

(A) Distribution of quantified species from plume analysis without ethanol

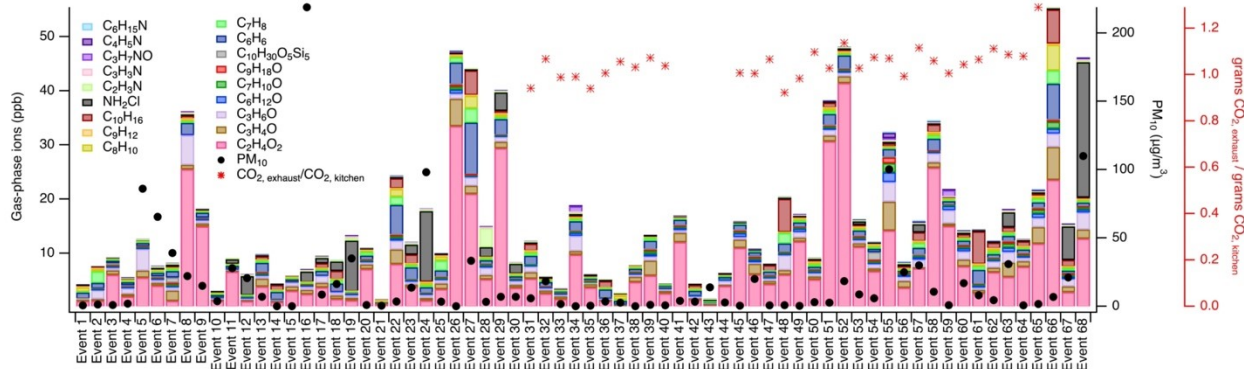

(B) Distribution of quantified species from plume analysis with ethanol

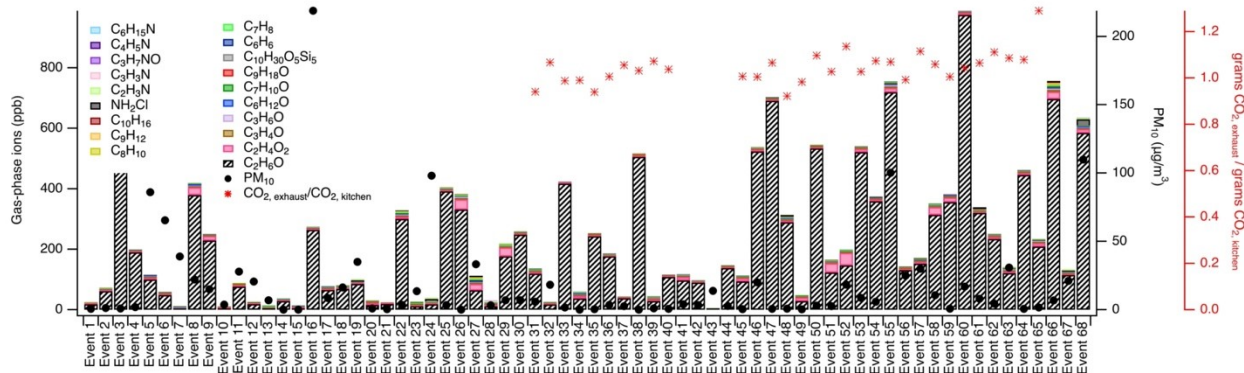

**Figure S9.** Results from plume analysis. (A) Distribution of quantified gases (left hand side axis), total PM<sub>10</sub> (black markers, right hand side axis) and ratio of CO<sub>2</sub> in exhaust to CO<sub>2</sub> in kitchen (red markers, right hand side axis) for each defined cooking event. Ethanol is excluded here to better visualize the contributions from the rest of the gases. (B) The same data as shown in (A) but with ethanol included to highlight its large contribution to the gas-phase species observed.

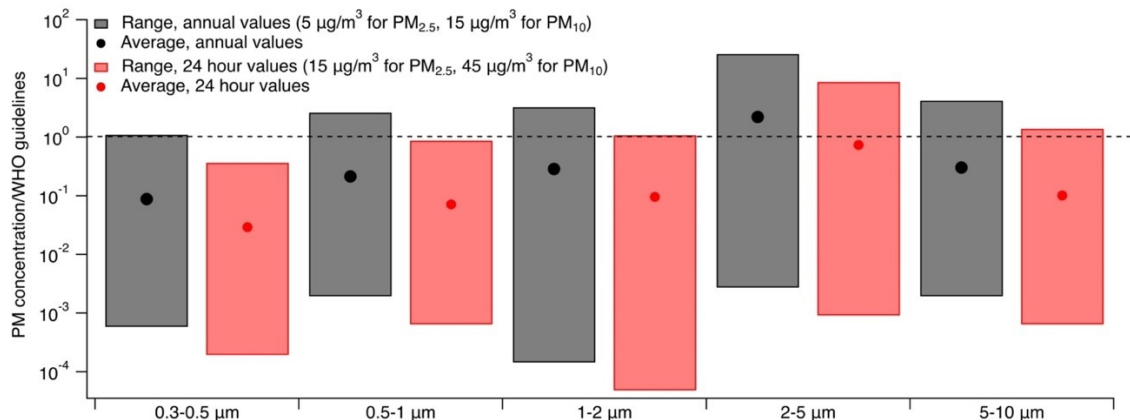

**Figure S10.** Comparison of particulate matter concentrations to World Health Organization concentration guidelines. Averages and ranges that surpass a ratio of 1 indicate that the observed concentration was greater than the World Health Organization concentration guideline.

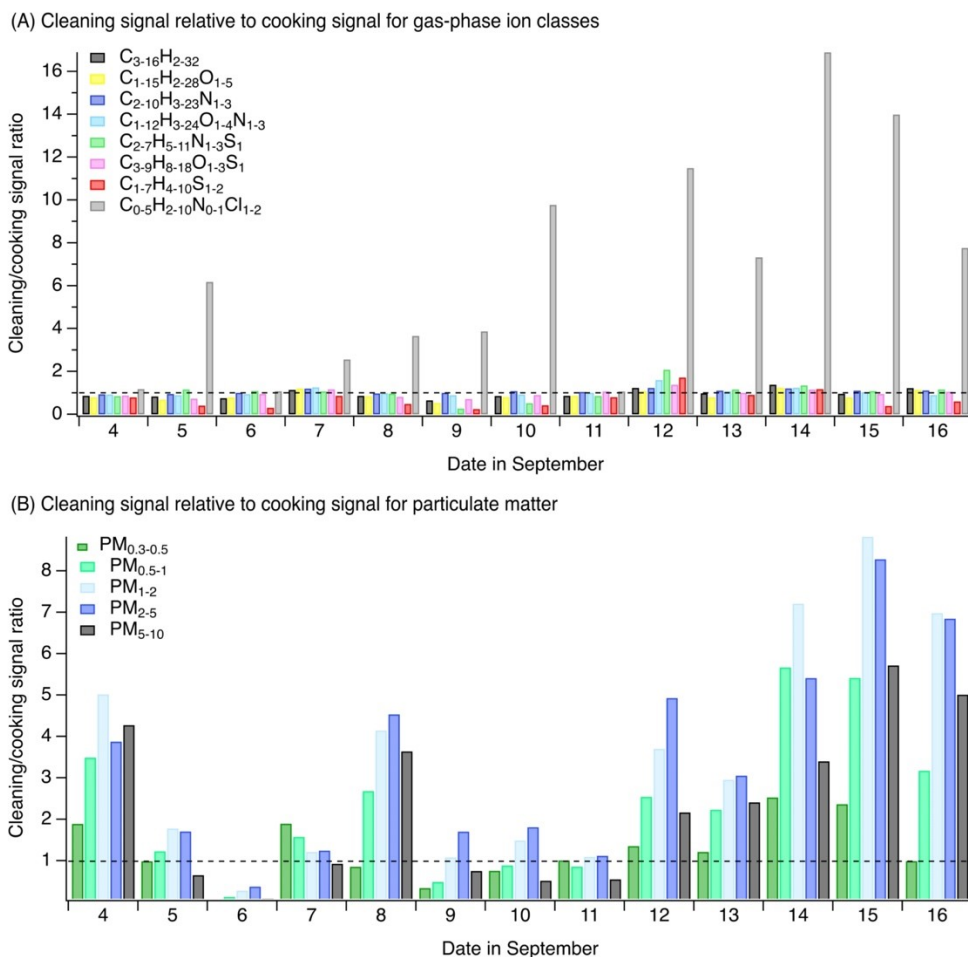

**Figure S11.** (A) Ion class signal from cleaning (typically 17:00-22:00) compared to signal from cooking (typically 8:00-16:00), and (B) particulate matter signal from cleaning (typically 17:00-22:00) compared to signal from cooking (typically 8:00-16:00), where the dotted line indicates a 1:1 ratio between the two periods.

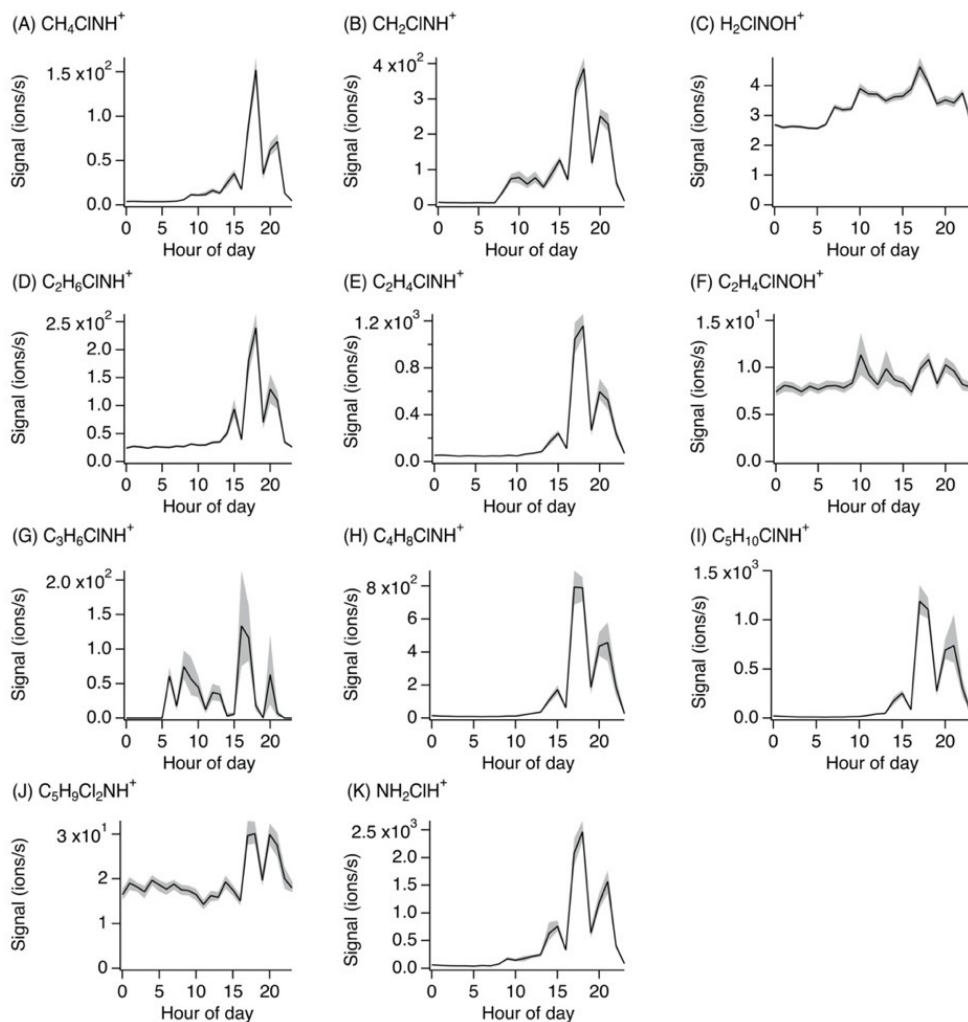

**Figure S12.** Diurnal trends of the observed chlorinated ions, where the black trace shows the mean signal and the grey shading represents the range of observed diurnal signals.

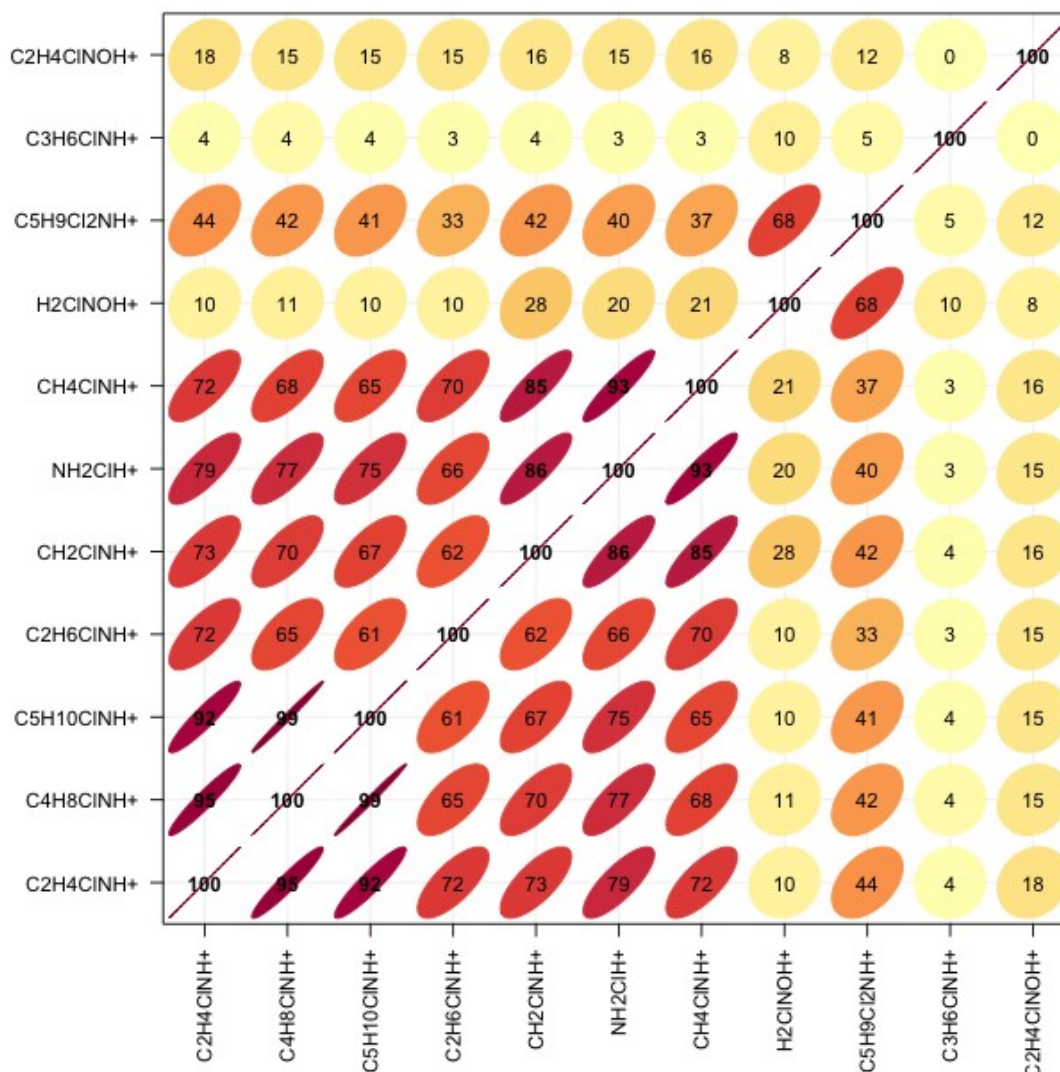

**Figure S13.** Correlation plot comparing chlorinated ion time series. Each chlorinated ion, except for HOClH<sup>+</sup> due to its very low signal, is shown both on the x- and y-axis. Numbers represent the Pearson correlation coefficient, multiplied by 100, between time series of each ion on the x-axis compared to each ion on the y-axis. Colors range from yellow to red, where yellow depicts lower correlation coefficient and red depicts higher correlation coefficient. The shape of the colored area is a visualization of the scatter plot between the two time series, where poorly correlated time series result in a circular shape on the plot, and very well-correlated time series end up with a narrow ellipse drawn at a 45 degree angle. All specifications here are from CorPlot function in the OpenAir R package.

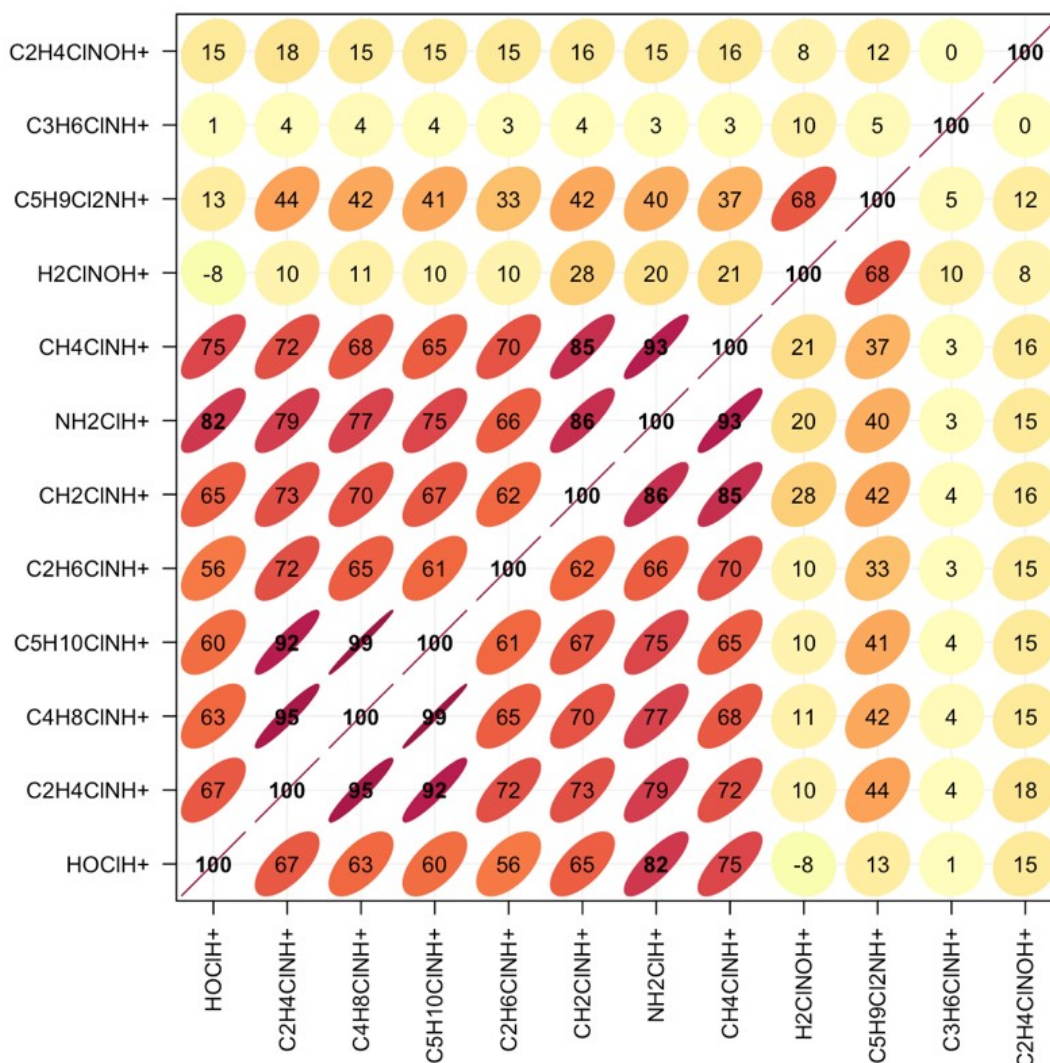

**Figure S14.** Correlation plot comparing chlorinated ion time series, with HOCIH<sup>+</sup> added. HOCIH<sup>+</sup> is otherwise not included elsewhere due to its very low signal.

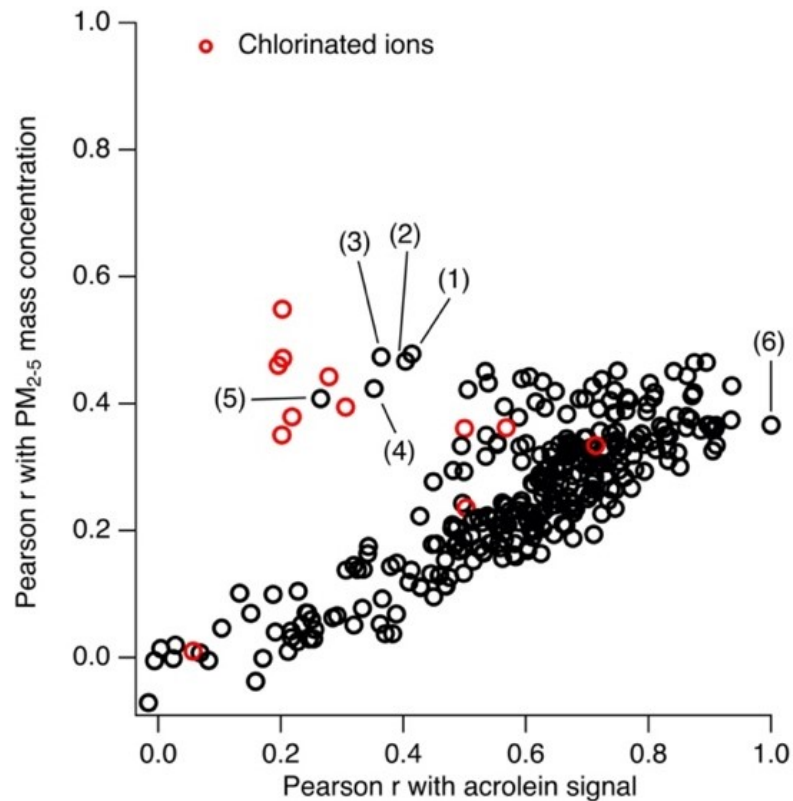

**Figure S15.** Pearson correlation coefficients for all identified gas-phase species with PM<sub>2.5</sub> concentration (which showed an increased contribution in the evening during cleaning) and with acrolein (which is known to be emitted from cooking, from the thermal degradation of heated cooking oils). Red markers represent chlorinated species, which were identified in Figure 4A. Numbered ions are non-chlorinated ions that showed strong correlations with PM<sub>2.5</sub> concentration, that are *not* identified in Figure 4A: (1) C<sub>6</sub>H<sub>7</sub>N<sub>3</sub>H<sup>+</sup>, (2) C<sub>4</sub>H<sub>8</sub>NH<sup>+</sup>, (3) C<sub>5</sub>H<sub>5</sub>N<sub>3</sub>O<sub>3</sub>H<sup>+</sup>, (4) C<sub>5</sub>H<sub>11</sub>NOH<sup>+</sup>, (5) C<sub>5</sub>H<sub>9</sub>NH<sup>+</sup>, (6) C<sub>3</sub>H<sub>5</sub>O<sup>+</sup> (acrolein and isomers).



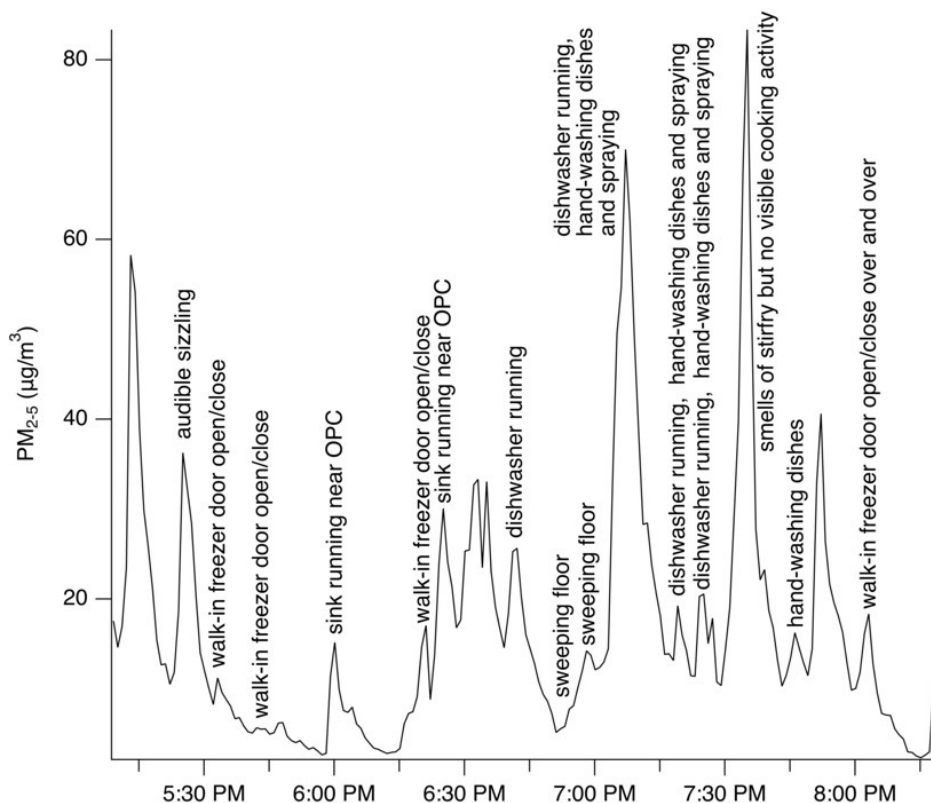

**Figure S16.** PM<sub>2.5</sub> concentration from the OPC, measured during a repeat sampling trip to kitchen post-campaign. Measurements were collected in the evening during kitchen cleaning. Specific cleaning-related activities are annotated.

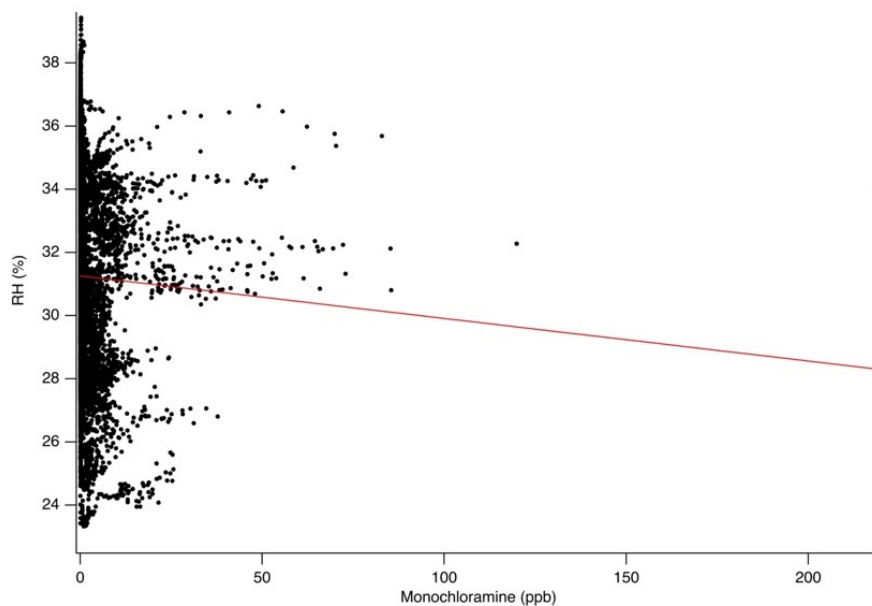

**Figure S17.** Scatter plot showing relative humidity in the kitchen (y-axis) vs. the monochloramine mixing ratio (x-axis). The best fit line is shown in red. The Pearson correlation coefficient was -0.02 for this distribution of datapoints, emphasizing the lack of correlation between monochloramine mixing ratio and kitchen relative humidity.

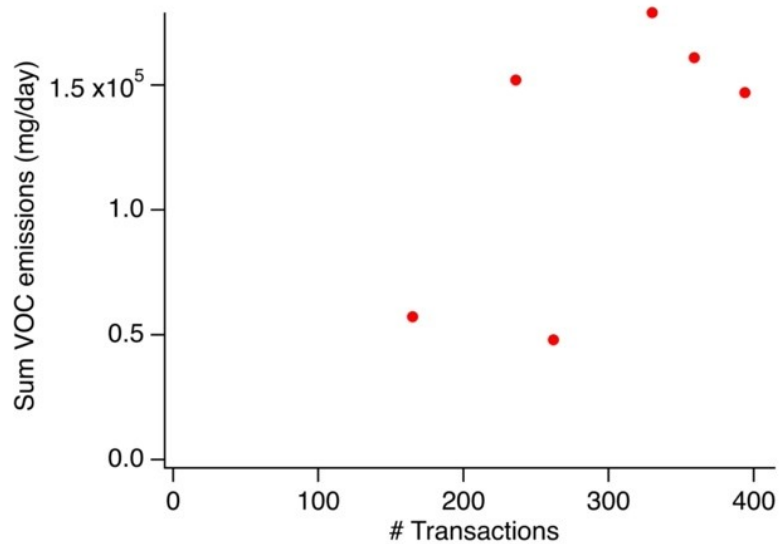

**Figure S18.** The sum of VOC emissions for each day between September 10-15, plotted against the number of transactions per day in that time range. This shows that the VOC emissions scaled with the number of daily transactions (which is related to the number of meals prepared per day).

**Table S1.** Defined cooking events. The early morning cooking periods were likely a result of kitchen staff beginning the day’s cooking earlier than the typical ~8:00, but could also contain influence from outdoor air as the ventilation was turned on at ~6:00 each day. “No log” indicates no log from the main kitchen cooking, but does not preclude customer-facing kitchen emissions.

| <b>Event</b> | <b>Time</b>                                | <b>Notes</b>         | <b>Food prepared based on main kitchen log (using best estimations from cooking end times reported)</b> |
|--------------|--------------------------------------------|----------------------|---------------------------------------------------------------------------------------------------------|
| Event 1      | 2021-09-04 06:08:00 to 2021-09-04 08:06:00 | Early morning        | No log                                                                                                  |
| Event 2      | 2021-09-04 08:24:00 to 2021-09-04 10:47:00 |                      | No log                                                                                                  |
| Event 3      | 2021-09-04 10:47:00 to 2021-09-04 11:19:00 |                      | No log                                                                                                  |
| Event 4      | 2021-09-04 11:37:00 to 2021-09-04 13:41:00 |                      | No log                                                                                                  |
| Event 5      | 2021-09-04 16:14:00 to 2021-09-04 17:47:00 | Cooking and cleaning | No log                                                                                                  |
| Event 6      | 2021-09-04 18:15:00 to 2021-09-04 20:06:00 | Cooking and cleaning | No log                                                                                                  |
| Event 7      | 2021-09-05 08:57:00 to 2021-09-05 10:09:00 |                      | Macaroni, vegetables, lentils, rice                                                                     |
| Event 8      | 2021-09-05 10:29:00 to 2021-09-05 11:39:00 |                      | Rice, enchiladas, souvlaki                                                                              |
| Event 9      | 2021-09-05 12:21:00 to 2021-09-05 13:13:00 |                      | Souvlaki, rice noodles, enchiladas, rice                                                                |
| Event 10     | 2021-09-05 14:21:00 to 2021-09-05 14:38:00 |                      | No log                                                                                                  |
| Event 11     | 2021-09-05 15:51:00 to 2021-09-05 16:40:00 |                      | Butter chicken, tagine, dahl, rice, vegetables                                                          |
| Event 12     | 2021-09-05 16:58:00 to 2021-09-05 17:54:00 | Cooking and cleaning | No log                                                                                                  |
| Event 13     | 2021-09-06 10:10:00 to 2021-09-06 11:55:00 |                      | Rice, peas, baked potato, salmon, chicken, broccoli, green beans                                        |
| Event 14     | 2021-09-06 13:05:00 to 2021-09-06 15:00:00 |                      | Spaghetti, chicken, salmon, green beans, broccoli, potato, carrots                                      |
| Event 15     | 2021-09-07 07:13:00 to 2021-09-07 07:51:00 | Early morning        | No log                                                                                                  |
| Event 16     | 2021-09-07 09:50:00 to 2021-09-07 10:11:00 |                      | Spaghetti                                                                                               |
| Event 17     | 2021-09-07 10:11:00 to 2021-09-07 11:10:00 |                      | Vegetables, chicken, rice, stew                                                                         |
| Event 18     | 2021-09-07 12:11:00 to 2021-09-07 13:48:00 |                      | Lentil pie, stroganoff                                                                                  |
| Event 19     | 2021-09-07 14:54:00 to 2021-09-07 15:57:00 |                      | Jerk chicken, pork, vegetables, rice                                                                    |
| Event 20     | 2021-09-08 07:25:00 to 2021-09-08 08:02:00 |                      | No log                                                                                                  |
| Event 21     | 2021-09-08 09:03:00 to 2021-09-08 09:23:00 |                      | Soup, rice                                                                                              |
| Event 22     | 2021-09-08 10:31:00 to 2021-09-08 11:47:00 |                      | Jerk chicken, rice, stroganoff, lentil pie, vegetables, quinoa                                          |
| Event 23     | 2021-09-08 14:57:00 to 2021-09-08 16:27:00 |                      | Rice, stroganoff, vegetables, chicken, lentil pie                                                       |
| Event 24     | 2021-09-08 21:04:00 to 2021-09-08 21:48:00 | Cooking and cleaning | No log                                                                                                  |
| Event 25     | 2021-09-09 07:23:00 to 2021-09-09 09:03:00 |                      | Soup                                                                                                    |
| Event 26     | 2021-09-09 10:30:00 to 2021-09-09 11:19:00 |                      | Chicken, rice, sole, vegetables                                                                         |

| <b>Event</b> | <b>Time</b>                                | <b>Notes</b>         | <b>Food prepared based on main kitchen log (using best estimations from cooking end times reported)</b> |
|--------------|--------------------------------------------|----------------------|---------------------------------------------------------------------------------------------------------|
| Event 27     | 2021-09-09 11:20:00 to 2021-09-09 12:50:00 |                      | Rice, vindaloo, butter chicken, chickpeas                                                               |
| Event 28     | 2021-09-09 13:24:00 to 2021-09-09 13:37:00 |                      | Pork, carrots                                                                                           |
| Event 29     | 2021-09-09 14:53:00 to 2021-09-09 15:30:00 |                      | Sole, quinoa, cauliflower, edamame                                                                      |
| Event 30     | 2021-09-09 16:16:00 to 2021-09-09 17:53:00 | Cooking and cleaning | Rice, chicken                                                                                           |
| Event 31     | 2021-09-10 07:14:00 to 2021-09-10 09:23:00 |                      | Soup, souvlaki                                                                                          |
| Event 32     | 2021-09-10 09:43:00 to 2021-09-10 11:24:00 |                      | Chicken, rice, vindaloo, chickpeas, carrots, rice, tagine                                               |
| Event 33     | 2021-09-10 12:17:00 to 2021-09-10 12:48:00 |                      | No log                                                                                                  |
| Event 34     | 2021-09-10 15:03:00 to 2021-09-10 15:51:00 |                      | No log                                                                                                  |
| Event 35     | 2021-09-10 16:21:00 to 2021-09-10 17:13:00 | Cooking and cleaning | No log                                                                                                  |
| Event 36     | 2021-09-10 19:02:00 to 2021-09-10 19:52:00 | Cooking and cleaning | No log                                                                                                  |
| Event 37     | 2021-09-10 20:11:00 to 2021-09-10 21:12:00 | Cooking and cleaning | No log                                                                                                  |
| Event 38     | 2021-09-11 12:17:00 to 2021-09-11 13:03:00 |                      | No log                                                                                                  |
| Event 39     | 2021-09-11 14:51:00 to 2021-09-11 15:31:00 |                      | No log                                                                                                  |
| Event 40     | 2021-09-11 16:07:00 to 2021-09-11 17:38:00 | Cooking and cleaning | No log                                                                                                  |
| Event 41     | 2021-09-12 07:22:00 to 2021-09-12 07:58:00 | Early morning        | No log                                                                                                  |
| Event 42     | 2021-09-12 08:19:00 to 2021-09-12 08:57:00 |                      | No log                                                                                                  |
| Event 43     | 2021-09-12 08:58:00 to 2021-09-12 09:53:00 |                      | No log                                                                                                  |
| Event 44     | 2021-09-12 10:00:00 to 2021-09-12 10:59:00 |                      | Soup                                                                                                    |
| Event 45     | 2021-09-12 12:15:00 to 2021-09-12 12:34:00 |                      | Chicken, baked potato                                                                                   |
| Event 46     | 2021-09-12 13:35:00 to 2021-09-12 14:41:00 |                      | Tofu                                                                                                    |
| Event 47     | 2021-09-12 14:42:00 to 2021-09-12 15:19:00 |                      | Tagine, vegetables, rice, naan                                                                          |
| Event 48     | 2021-09-13 06:21:00 to 2021-09-13 07:33:00 | Early morning        | No log                                                                                                  |
| Event 49     | 2021-09-13 09:05:00 to 2021-09-13 09:21:00 |                      | Soup                                                                                                    |
| Event 50     | 2021-09-13 09:22:00 to 2021-09-13 10:31:00 |                      | Chicken, potato, rice, peas                                                                             |
| Event 51     | 2021-09-13 10:35:00 to 2021-09-13 11:45:00 |                      | Chicken, baked potato, salmon, cauliflower, tofu, green beans                                           |
| Event 52     | 2021-09-13 13:48:00 to 2021-09-13 14:10:00 |                      | Chicken, baked potato, salmon, cauliflower, tofu, green beans                                           |
| Event 53     | 2021-09-13 16:14:00 to 2021-09-13 17:33:00 | Cooking and cleaning | No log                                                                                                  |
| Event 54     | 2021-09-14 09:36:00 to 2021-09-14 10:34:00 |                      | Soup, spaghetti, rice, chicken                                                                          |
| Event 55     | 2021-09-14 11:56:00 to 2021-09-14 15:11:00 |                      | Chicken, rice, potato, eggplant, bok choy, pork, carrot, butternut squash                               |

| <b>Event</b> | <b>Time</b>                                | <b>Notes</b>         | <b>Food prepared based on main kitchen log (using best estimations from cooking end times reported)</b> |
|--------------|--------------------------------------------|----------------------|---------------------------------------------------------------------------------------------------------|
| Event 56     | 2021-09-14 15:12:00 to 2021-09-14 16:03:00 |                      | No log                                                                                                  |
| Event 57     | 2021-09-14 16:07:00 to 2021-09-14 16:47:00 |                      | Chicken, rice, vegetables                                                                               |
| Event 58     | 2021-09-15 10:17:00 to 2021-09-15 11:19:00 |                      | Chicken, rice, lasagna, stew, vegetables, lentils                                                       |
| Event 59     | 2021-09-15 11:31:00 to 2021-09-15 11:57:00 |                      | Alfredo pasta                                                                                           |
| Event 60     | 2021-09-15 13:00:00 to 2021-09-15 14:06:00 |                      | Soup                                                                                                    |
| Event 61     | 2021-09-15 14:23:00 to 2021-09-15 14:49:00 |                      |                                                                                                         |
| Event 62     | 2021-09-15 14:54:00 to 2021-09-15 15:26:00 |                      | Chicken, rice, lasagna, stew, vegetables                                                                |
| Event 63     | 2021-09-15 15:27:00 to 2021-09-15 17:41:00 | Cooking and cleaning | No log                                                                                                  |
| Event 64     | 2021-09-16 06:53:00 to 2021-09-16 08:08:00 | Early morning        | No log                                                                                                  |
| Event 65     | 2021-09-16 10:36:00 to 2021-09-16 11:25:00 |                      | Chicken, noodles, tofu, fish, broccoli, mushrooms                                                       |
| Event 66     | 2021-09-16 11:50:00 to 2021-09-16 12:40:00 |                      | Lentils, tagine, chicken                                                                                |
| Event 67     | 2021-09-16 13:57:00 to 2021-09-16 16:39:00 |                      | Chicken, noodles, fish, broccoli, mushrooms, rice                                                       |
| Event 68     | 2021-09-16 17:37:00 to 2021-09-16 19:24:00 | Cooking and cleaning | No log                                                                                                  |

**Table S2.** Average indoor emission ratios (ER) of each volatile organic compound (VOC) and of particulate matter (PM) relative to CO<sub>2</sub> concentrations measured in the kitchen.

| VOC                                                            | Average ER,<br>µgVOC/gCO <sub>2</sub> | Standard<br>deviation,<br>µgVOC/gCO <sub>2</sub> |
|----------------------------------------------------------------|---------------------------------------|--------------------------------------------------|
| C <sub>2</sub> H <sub>6</sub> O                                | 3.51E+04                              | 4.32E+04                                         |
| C <sub>2</sub> H <sub>4</sub> O <sub>2</sub>                   | 1.33E+03                              | 1.73E+03                                         |
| C <sub>3</sub> H <sub>4</sub> O                                | 1.82E+02                              | 2.59E+02                                         |
| C <sub>3</sub> H <sub>6</sub> O                                | 1.23E+02                              | 1.26E+02                                         |
| C <sub>6</sub> H <sub>12</sub> O                               | 1.04E+02                              | 1.53E+02                                         |
| C <sub>7</sub> H <sub>10</sub> O                               | 6.65E+01                              | 9.79E+01                                         |
| C <sub>9</sub> H <sub>18</sub> O                               | 5.97E+01                              | 8.63E+01                                         |
| C <sub>10</sub> H <sub>30</sub> O <sub>5</sub> Si <sub>5</sub> | 3.21E+01                              | 1.65E+02                                         |
| C <sub>6</sub> H <sub>6</sub>                                  | 2.57E+02                              | 3.22E+02                                         |
| C <sub>7</sub> H <sub>8</sub>                                  | 7.51E+01                              | 8.52E+01                                         |
| C <sub>8</sub> H <sub>10</sub>                                 | 3.36E+01                              | 4.95E+01                                         |
| C <sub>9</sub> H <sub>12</sub>                                 | 1.16E+01                              | 2.07E+01                                         |
| C <sub>10</sub> H <sub>16</sub>                                | 2.13E+02                              | 3.93E+02                                         |
| NH <sub>2</sub> Cl                                             | 1.98E+01                              | 2.79E+01                                         |
| C <sub>2</sub> H <sub>3</sub> N                                | 4.20E+00                              | 4.52E+00                                         |
| C <sub>3</sub> H <sub>3</sub> N                                | 1.16E+00                              | 2.99E+00                                         |
| C <sub>3</sub> H <sub>7</sub> NO                               | 2.25E+01                              | 3.63E+01                                         |
| C <sub>4</sub> H <sub>5</sub> N                                | 1.12E+01                              | 1.58E+01                                         |
| C <sub>6</sub> H <sub>15</sub> N                               | 9.84E-01                              | 2.14E+00                                         |
| PM size bin                                                    | Average ER,<br>µgPM/gCO <sub>2</sub>  | Standard<br>deviation,<br>µgPM/gCO <sub>2</sub>  |
| PM <sub>0.3-0.5</sub>                                          | 1.68E+02                              | 2.05E+02                                         |
| PM <sub>0.5-1</sub>                                            | 3.37E+02                              | 4.79E+02                                         |
| PM <sub>1-2</sub>                                              | 2.60E+02                              | 3.27E+02                                         |
| PM <sub>2-5</sub>                                              | 2.12E+03                              | 2.68E+03                                         |
| PM <sub>5-10</sub>                                             | 1.15E+03                              | 1.55E+03                                         |

**Table S3.** Estimated tonnes/year emitted to the outdoors for this kitchen. We note that our measurements include isomers of each specified molecular formula and are therefore likely upper limits of emissions relative to the compound-specific literature estimates (except for xylenes and monoterpenes, which also account for multiple isomers). Lower and upper limit values are included, to represent 0.58 meals/day/person prepared commercially up to 3 meals/day/person prepared commercially.

| VOC                                                            | Average estimated tonnes/year                                                           | Literature estimated tonnes/year                         |
|----------------------------------------------------------------|-----------------------------------------------------------------------------------------|----------------------------------------------------------|
| C <sub>2</sub> H <sub>6</sub> O                                | 2.27E+02-1.17+03                                                                        |                                                          |
| C <sub>2</sub> H <sub>4</sub> O <sub>2</sub>                   | 8.60E+00-4.45E+01                                                                       |                                                          |
| C <sub>3</sub> H <sub>4</sub> O                                | 1.24E+00-6.39E+00                                                                       | Acrolein: 7.70E+00 (8)                                   |
| C <sub>3</sub> H <sub>6</sub> O                                | 9.86E-01-5.10E+00                                                                       | Acetone: 2.70E+00 (8), Propanal: 5.00E-01 (8)            |
| C <sub>6</sub> H <sub>12</sub> O                               | 6.64E-01-3.43E+00                                                                       |                                                          |
| C <sub>7</sub> H <sub>10</sub> O                               | 5.59E-01-2.89E+00                                                                       |                                                          |
| C <sub>9</sub> H <sub>18</sub> O                               | 4.42E-01-2.28E+00                                                                       | Nonanal: 5.00E+00 (8)                                    |
| C <sub>10</sub> H <sub>30</sub> O <sub>5</sub> Si <sub>5</sub> | 3.89E-01-2.01E+00                                                                       |                                                          |
| C <sub>6</sub> H <sub>6</sub>                                  | 1.65E+00-8.54E+00                                                                       | Benzene: 8.20E+00 (5)                                    |
| C <sub>7</sub> H <sub>8</sub>                                  | 5.85E-01-3.02E+00                                                                       | Toluene: 8.20E+00 (5)                                    |
| C <sub>8</sub> H <sub>10</sub>                                 | 2.43E-01-1.26E+00                                                                       | Xylenes: 9.10E+00 (5)                                    |
| C <sub>9</sub> H <sub>12</sub>                                 | 8.83E-02-4.57E-01                                                                       |                                                          |
| C <sub>10</sub> H <sub>16</sub>                                | 1.60E+00-8.28E+00                                                                       | Monoterpenes: 3.60E+00 (5)                               |
| NH <sub>2</sub> Cl                                             | 2.71E-01-1.40E+00                                                                       |                                                          |
| C <sub>2</sub> H <sub>3</sub> N                                | 3.29E-02-1.70E-01                                                                       | Acetonitrile: 9.00E-01 (5)                               |
| C <sub>3</sub> H <sub>3</sub> N                                | 3.99E-03-2.06E-02                                                                       |                                                          |
| C <sub>3</sub> H <sub>7</sub> NO                               | 1.42E-01-7.34E-01                                                                       |                                                          |
| C <sub>4</sub> H <sub>5</sub> N                                | 1.24E-01-6.40E-01                                                                       |                                                          |
| C <sub>6</sub> H <sub>15</sub> N                               | 8.56E-03-4.43E-02                                                                       |                                                          |
| SUM                                                            | 2.44E+02-1.26E+03<br>(equates to<br>8.75E-05-4.53E-04 tonnes/year-person in<br>Toronto) | 4.70E-05 tonnes/year-person in China (9)                 |
| PM size bin                                                    | Average estimated tonnes/year                                                           | Literature estimated tonnes/year                         |
| PM <sub>0.3-0.5</sub>                                          | 2.51E-01-1.30E+00                                                                       |                                                          |
| PM <sub>0.5-1</sub>                                            | 5.50E-01-2.85E+00                                                                       |                                                          |
| PM <sub>1-2</sub>                                              | 5.49E-01-2.84E+00                                                                       |                                                          |
| PM <sub>2-5</sub>                                              | 3.61E+00-1.87E+01                                                                       |                                                          |
| PM <sub>5-10</sub>                                             | 1.98E+00-1.03E+01                                                                       |                                                          |
| SUM                                                            | 6.94E+00-3.59E+01<br>(equates to<br>2.48E-06-1.28E-05 tonnes/year-person in<br>Toronto) | Cooking organic aerosol (PM <sub>1</sub> ): 7.25E+02 (5) |

**Table S4.** NIOSH recommended exposure limits (REL), other exposure limits considered, and odor thresholds for calibrated compounds.

| Compound                                                                      | NIOSH REL (ppm) <a href="#">[link]</a> | Other exposure limit (ppm)     | Odor threshold (ppm)            | Average mixing ratio from plume analysis (ppb) |
|-------------------------------------------------------------------------------|----------------------------------------|--------------------------------|---------------------------------|------------------------------------------------|
| Ethanol (C <sub>2</sub> H <sub>6</sub> O)                                     | 1000                                   | -                              | 10 <a href="#">[link]</a>       | 211.5                                          |
| Acetic acid (C <sub>2</sub> H <sub>4</sub> O <sub>2</sub> )                   | 10                                     | -                              | 0.21-1 <a href="#">[link]</a>   | 8.0                                            |
| Acrolein (C <sub>3</sub> H <sub>4</sub> O)                                    | 0.1                                    | -                              | 60 <a href="#">[link]</a>       | 1.1                                            |
| Acetone (C <sub>3</sub> H <sub>6</sub> O)                                     | 250                                    | -                              | 13 <a href="#">[link]</a>       | 1.0                                            |
| Hexanal (C <sub>6</sub> H <sub>12</sub> O)                                    | -                                      | 10* <a href="#">[link]</a>     | 1 <a href="#">[link]</a>        | 0.3                                            |
| Heptadienal (C <sub>7</sub> H <sub>10</sub> O)                                | -                                      | -                              | 0.2-1.1 <a href="#">[link]</a>  | 0.2                                            |
| Nonanal (C <sub>9</sub> H <sub>18</sub> O)                                    | -                                      | -                              | -                               | 0.1                                            |
| D5-Siloaxne (C <sub>10</sub> H <sub>30</sub> O <sub>5</sub> Si <sub>5</sub> ) | -                                      | 10** <a href="#">[link]</a>    | -                               | 0.1                                            |
| Benzene (C <sub>6</sub> H <sub>6</sub> )                                      | 0.1                                    | -                              | 4.68 <a href="#">[link]</a>     | 1.4                                            |
| Toluene (C <sub>7</sub> H <sub>8</sub> )                                      | 100                                    | -                              | 2.14 <a href="#">[link]</a>     | 0.5                                            |
| o-Xylene (C <sub>8</sub> H <sub>10</sub> )                                    | 100                                    | -                              | 1 <a href="#">[link]</a>        | 0.3                                            |
| 1,3,5-Trimethylbenzene (C <sub>9</sub> H <sub>12</sub> )                      | 25                                     | -                              | 2.4 <a href="#">[link]</a>      | 0.1                                            |
| Limonene (C <sub>10</sub> H <sub>16</sub> )                                   | 100                                    | -                              | 0.015 <a href="#">[link]</a>    | 0.8                                            |
| Monochloramine (NH <sub>2</sub> Cl)                                           | -                                      | 0.05*** <a href="#">[link]</a> | -                               | 1.3                                            |
| Acetonitrile (C <sub>2</sub> H <sub>3</sub> N)                                | 20                                     | -                              | 98 <a href="#">[link]</a>       | 0.1                                            |
| Acrylonitrile (C <sub>3</sub> H <sub>3</sub> N)                               | 1                                      | -                              | 1.6 <a href="#">[link]</a>      | 0.01                                           |
| Propionamide (C <sub>3</sub> H <sub>7</sub> NO)                               | -                                      | -                              | -                               | 0.1                                            |
| Pyrrole (C <sub>4</sub> H <sub>5</sub> N)                                     | -                                      | -                              | -                               | 0.1                                            |
| Triethylamine (C <sub>6</sub> H <sub>15</sub> N)                              | -                                      | 25**** <a href="#">[link]</a>  | 0.1-0.48 <a href="#">[link]</a> | 0.004                                          |

\*Hexanal reported to cause mild irritation after 2 hours of exposure at 10 ppm

\*\* D5-siloxane exposure guideline is an 8-hour time weighted average workplace environmental exposure level where no adverse effects are expected, with a significant safety factor

\*\*\* Monochloramine exposure guidelines are uncertain and may be as low as 50 ppb, and an 8-hour timeweighted average occupational exposure limit for trichloramine is 20-40 ppb

\*\*\*\*Triethylamine exposure limit is a NIOSH permissible exposure limit (PEL)



**Table S5.** Average VOC emissions computed per meal (obtained by summing together emissions from all cooking events per day and dividing by the number of transactions that day, from September 10-15), along with standard deviation.

| VOC                                                            | Average, mg/meal | Standard deviation, mg/meal |
|----------------------------------------------------------------|------------------|-----------------------------|
| C <sub>2</sub> H <sub>6</sub> O                                | 383.4            | 180.8                       |
| C <sub>2</sub> H <sub>4</sub> O <sub>2</sub>                   | 14.5             | 11.5                        |
| C <sub>3</sub> H <sub>4</sub> O                                | 2.1              | 1.0                         |
| C <sub>3</sub> H <sub>6</sub> O                                | 1.7              | 1.0                         |
| C <sub>6</sub> H <sub>12</sub> O                               | 1.1              | 0.7                         |
| C <sub>7</sub> H <sub>10</sub> O                               | 1.0              | 0.8                         |
| C <sub>9</sub> H <sub>18</sub> O                               | 0.8              | 0.6                         |
| C <sub>10</sub> H <sub>30</sub> O <sub>5</sub> Si <sub>5</sub> | 0.7              | 1.5                         |
| C <sub>6</sub> H <sub>6</sub>                                  | 2.8              | 1.6                         |
| C <sub>7</sub> H <sub>8</sub>                                  | 1.0              | 0.8                         |
| C <sub>8</sub> H <sub>10</sub>                                 | 0.4              | 0.4                         |
| C <sub>9</sub> H <sub>12</sub>                                 | 0.2              | 0.1                         |
| C <sub>10</sub> H <sub>16</sub>                                | 2.8              | 1.8                         |
| NH <sub>2</sub> Cl                                             | 0.5              | 0.6                         |
| C <sub>2</sub> H <sub>3</sub> N                                | 0.05             | 0.05                        |
| C <sub>3</sub> H <sub>3</sub> N                                | 0.007            | 0.005                       |
| C <sub>3</sub> H <sub>7</sub> NO                               | 0.2              | 0.1                         |
| C <sub>4</sub> H <sub>5</sub> N                                | 0.2              | 0.3                         |
| C <sub>6</sub> H <sub>15</sub> N                               | 0.01             | 0.02                        |
| PM size bin                                                    | Average, mg/meal | Standard deviation, mg/meal |
| PM <sub>0.3-0.5</sub>                                          | 0.4              | 0.6                         |
| PM <sub>0.5-1</sub>                                            | 1.0              | 1.5                         |
| PM <sub>1-2</sub>                                              | 1.0              | 1.1                         |
| PM <sub>2-5</sub>                                              | 6.1              | 5.5                         |
| PM <sub>5-10</sub>                                             | 3.3              | 3.6                         |

**Table S6.** Highest abundance ion signals with assigned molecular formulas, ranked by signal intensity (ions/s). All ions are assumed to be protonated.

| Highest abundance 100 ions with assigned formula                                 |                                                                   |                                                                   |                                                                                |
|----------------------------------------------------------------------------------|-------------------------------------------------------------------|-------------------------------------------------------------------|--------------------------------------------------------------------------------|
| 1. C <sub>2</sub> H <sub>5</sub> O <sub>2</sub> H <sup>+</sup>                   | 26. C <sub>3</sub> H <sub>8</sub> OSH <sup>+</sup>                | 51. C <sub>10</sub> H <sub>12</sub> OH <sup>+</sup>               | 76. C <sub>10</sub> H <sub>16</sub> OH <sup>+</sup>                            |
| 2. C <sub>3</sub> H <sub>6</sub> OH <sup>+</sup>                                 | 27. C <sub>7</sub> H <sub>12</sub> OH <sup>+</sup>                | 52. C <sub>10</sub> H <sub>15</sub> <sup>+</sup>                  | 77. C <sub>6</sub> H <sub>8</sub> O <sub>2</sub> H <sup>+</sup>                |
| 3. C <sub>2</sub> H <sub>6</sub> OH <sup>+</sup>                                 | 28. C <sub>4</sub> H <sub>9</sub> <sup>+</sup>                    | 53. C <sub>6</sub> H <sub>10</sub> O <sub>2</sub> H <sup>+</sup>  | 78. C <sub>3</sub> H <sub>8</sub> O <sub>3</sub> H <sup>+</sup>                |
| 4. C <sub>4</sub> H <sub>8</sub> OH <sup>+</sup>                                 | 29. C <sub>2</sub> H <sub>3</sub> NO <sub>3</sub> H <sup>+</sup>  | 54. C <sub>8</sub> H <sub>9</sub> <sup>+</sup>                    | 79. C <sub>5</sub> H <sub>6</sub> OH <sup>+</sup>                              |
| 5. C <sub>10</sub> H <sub>30</sub> O <sub>5</sub> Si <sub>5</sub> H <sup>+</sup> | 30. C <sub>7</sub> H <sub>6</sub> OH <sup>+</sup>                 | 55. C <sub>6</sub> H <sub>7</sub> <sup>+</sup>                    | 80. C <sub>7</sub> H <sub>12</sub> O <sub>2</sub> H <sup>+</sup>               |
| 6. C <sub>2</sub> H <sub>4</sub> N <sub>2</sub> H <sup>+</sup>                   | 31. C <sub>6</sub> H <sub>10</sub> OH <sup>+</sup>                | 56. C <sub>7</sub> H <sub>13</sub> <sup>+</sup>                   | 81. C <sub>5</sub> H <sub>10</sub> OH <sup>+</sup>                             |
| 7. C <sub>2</sub> H <sub>4</sub> OH <sup>+</sup>                                 | 32. C <sub>3</sub> H <sub>4</sub> O <sub>3</sub> H <sup>+</sup>   | 57. C <sub>6</sub> H <sub>6</sub> O <sub>3</sub> H <sup>+</sup>   | 82. C <sub>3</sub> H <sub>6</sub> O <sub>3</sub> H <sup>+</sup>                |
| 8. C <sub>2</sub> H <sub>2</sub> OH <sup>+</sup>                                 | 33. C <sub>4</sub> H <sub>8</sub> O <sub>2</sub> H <sup>+</sup>   | 58. C <sub>2</sub> H <sub>6</sub> O <sub>2</sub> H <sup>+</sup>   | 83. C <sub>3</sub> H <sub>2</sub> O <sub>3</sub> H <sup>+</sup>                |
| 9. C <sub>9</sub> H <sub>10</sub> OH <sup>+</sup>                                | 34. C <sub>4</sub> H <sub>6</sub> OH <sup>+</sup>                 | 59. C <sub>9</sub> H <sub>20</sub> O <sub>2</sub> H <sup>+</sup>  | 84. C <sub>6</sub> H <sub>13</sub> <sup>+</sup>                                |
| 10. C <sub>5</sub> H <sub>9</sub> <sup>+</sup>                                   | 35. C <sub>10</sub> H <sub>18</sub> OH <sup>+</sup>               | 60. C <sub>5</sub> H <sub>8</sub> OH <sup>+</sup>                 | 85. C <sub>8</sub> H <sub>16</sub> OH <sup>+</sup>                             |
| 11. C <sub>6</sub> H <sub>4</sub> O <sub>2</sub> H <sup>+</sup>                  | 36. C <sub>6</sub> H <sub>4</sub> O <sub>3</sub> H <sup>+</sup>   | 61. C <sub>7</sub> H <sub>10</sub> O <sub>4</sub> H <sup>+</sup>  | 86. C <sub>9</sub> H <sub>13</sub> <sup>+</sup>                                |
| 12. C <sub>3</sub> H <sub>4</sub> OH <sup>+</sup>                                | 37. C <sub>5</sub> H <sub>11</sub> <sup>+</sup>                   | 62. C <sub>6</sub> H <sub>14</sub> O <sub>3</sub> H <sup>+</sup>  | 87. CH <sub>3</sub> NOH <sup>+</sup>                                           |
| 13. C <sub>6</sub> H <sub>6</sub> OH <sup>+</sup>                                | 38. C <sub>5</sub> H <sub>8</sub> O <sub>2</sub> H <sup>+</sup>   | 63. C <sub>9</sub> H <sub>17</sub> <sup>+</sup>                   | 88. C <sub>4</sub> H <sub>10</sub> O <sub>2</sub> H <sup>+</sup>               |
| 14. C <sub>7</sub> H <sub>11</sub> <sup>+</sup>                                  | 39. C <sub>2</sub> H <sub>3</sub> NH <sup>+</sup>                 | 64. C <sub>4</sub> H <sub>4</sub> O <sub>2</sub> H <sup>+</sup>   | 89. NH <sub>2</sub> ClH <sup>+</sup>                                           |
| 15. C <sub>6</sub> H <sub>9</sub> <sup>+</sup>                                   | 40. C <sub>4</sub> H <sub>4</sub> O <sub>3</sub> H <sup>+</sup>   | 65. C <sub>3</sub> H <sub>4</sub> O <sub>4</sub> H <sup>+</sup>   | 90. C <sub>6</sub> H <sub>12</sub> OH <sup>+</sup>                             |
| 16. C <sub>3</sub> H <sub>6</sub> O <sub>2</sub> H <sup>+</sup>                  | 41. C <sub>8</sub> H <sub>15</sub> <sup>+</sup>                   | 66. C <sub>5</sub> H <sub>4</sub> O <sub>3</sub> H <sup>+</sup>   | 91. C <sub>6</sub> H <sub>8</sub> OH <sup>+</sup>                              |
| 17. C <sub>2</sub> H <sub>6</sub> O <sub>3</sub> H <sup>+</sup>                  | 42. C <sub>3</sub> H <sub>8</sub> O <sub>2</sub> H <sup>+</sup>   | 67. C <sub>11</sub> H <sub>22</sub> O <sub>2</sub> H <sup>+</sup> | 92. C <sub>4</sub> H <sub>6</sub> O <sub>3</sub> H <sup>+</sup>                |
| 18. C <sub>8</sub> H <sub>14</sub> OH <sup>+</sup>                               | 43. C <sub>7</sub> H <sub>9</sub> <sup>+</sup>                    | 68. C <sub>3</sub> H <sub>7</sub> <sup>+</sup>                    | 93. C <sub>6</sub> H <sub>12</sub> O <sub>2</sub> H <sup>+</sup>               |
| 19. C <sub>6</sub> H <sub>11</sub> <sup>+</sup>                                  | 44. C <sub>10</sub> H <sub>20</sub> O <sub>2</sub> H <sup>+</sup> | 69. C <sub>7</sub> H <sub>10</sub> OH <sup>+</sup>                | 94. C <sub>8</sub> H <sub>16</sub> O <sub>2</sub> H <sup>+</sup>               |
| 20. C <sub>9</sub> H <sub>18</sub> O <sub>2</sub> H <sup>+</sup>                 | 45. C <sub>6</sub> H <sub>8</sub> N <sub>2</sub> H <sup>+</sup>   | 70. C <sub>2</sub> H <sub>3</sub> NO <sub>2</sub> H <sup>+</sup>  | 95. C <sub>10</sub> H <sub>14</sub> OH <sup>+</sup>                            |
| 21. C <sub>7</sub> H <sub>7</sub> <sup>+</sup>                                   | 46. C <sub>5</sub> H <sub>4</sub> O <sub>2</sub> H <sup>+</sup>   | 71. C <sub>11</sub> H <sub>20</sub> OH <sup>+</sup>               | 96. C <sub>2</sub> H <sub>4</sub> N <sub>2</sub> O <sub>2</sub> H <sup>+</sup> |
| 22. C <sub>3</sub> H <sub>3</sub> <sup>+</sup>                                   | 47. C <sub>8</sub> H <sub>11</sub> <sup>+</sup>                   | 72. C <sub>9</sub> H <sub>16</sub> OH <sup>+</sup>                | 97. C <sub>5</sub> H <sub>10</sub> O <sub>2</sub> H <sup>+</sup>               |
| 23. C <sub>9</sub> H <sub>18</sub> OH <sup>+</sup>                               | 48. C <sub>5</sub> H <sub>7</sub> <sup>+</sup>                    | 73. C <sub>9</sub> H <sub>15</sub> <sup>+</sup>                   | 98. C <sub>8</sub> H <sub>14</sub> O <sub>2</sub> H <sup>+</sup>               |
| 24. C <sub>4</sub> H <sub>6</sub> O <sub>2</sub> H <sup>+</sup>                  | 49. C <sub>3</sub> H <sub>2</sub> O <sub>2</sub> H <sup>+</sup>   | 74. C <sub>5</sub> H <sub>6</sub> O <sub>2</sub> H <sup>+</sup>   | 99. C <sub>9</sub> H <sub>12</sub> O <sub>2</sub> H <sup>+</sup>               |
| 25. C <sub>10</sub> H <sub>17</sub> <sup>+</sup>                                 | 50. C <sub>3</sub> H <sub>5</sub> <sup>+</sup>                    | 75. C <sub>4</sub> H <sub>6</sub> O <sub>4</sub> H <sup>+</sup>   | 100. C <sub>7</sub> H <sub>14</sub> OH <sup>+</sup>                            |

## References

1. Sekimoto K, Li SM, Yuan B, Koss A, Coggon M, Warneke C, et al. Calculation of the sensitivity of proton-transfer-reaction mass spectrometry (PTR-MS) for organic trace gases using molecular properties. *Int J Mass Spectrom.* 2017;421:71–94.
2. Crilley LR, Lao M, Salehpoor L, VandenBoer TC. An instrument to measure and speciate the total reactive nitrogen budget indoors: description and field measurements. *Environ Sci Process Impacts.* 2023;25:389-404.
3. Wang C, Liggio J, Wentzell JJB, Jorga S, Abbatt JPD. Chloramines as an important photochemical source of chlorine atoms in urban atmosphere. In Review.
4. Arata C, Misztal PK, Tian Y, Lunderberg DM, Kristensen K, Novoselac A, et al. Volatile organic compound emissions during HOMEChem. *Indoor Air.* 2021 Nov 1;31(6):2099–117.
5. Fameli KM, Kladakis A, Assimakopoulos VD. Inventory of Commercial Cooking Activities and Emissions in a Typical Urban Area in Greece. *Atmosphere.* 2022 May 1;13(792):1–22.
6. Arı A, Ertürk Arı P, Yenisoay-Karakaş S, Gaga EO. Source characterization and risk assessment of occupational exposure to volatile organic compounds (VOCs) in a barbecue restaurant. *Build Environ.* 2020 May 1;174:1–8.
7. Wang JM, Jeong CH, Zimmerman N, Healy RM, Wang DK, Ke F, et al. Plume-based analysis of vehicle fleet air pollutant emissions and the contribution from high emitters. *Atmos Meas Tech.* 2015 Aug 13;8(8):3263–75.
8. Ho SSH, Yu JZ, Chu KW, Yeung LL. Carbonyl emissions from commercial cooking sources in Hong Kong. *J Air Waste Manage Assoc.* 2006;56(8):1091–8.
9. Wang H, Xiang Z, Wang L, Jing S, Lou S, Tao S, et al. Emissions of volatile organic compounds (VOCs) from cooking and their speciation: A case study for Shanghai with implications for China. *Science of the Total Environment.* 2018 Apr 15;621:1300–9.
